# Supplementary material
Source: MDPI journal article supplement (https://www.mdpi.com/2311-5637/7/2/86)
Supplement: s1 [file s1 › fermentation-1230442-supplementary.pdf]

Supplementary Material

# Optimization of Yeast, Sugar and Nutrient Concentrations for High Ethanol Production Rate Using Industrial Sugar Beet Molasses and Response Surface Methodology

Jean-Baptiste Beigbeder, Julia Maria de Medeiros Dantas and Jean-Michel Lavoie \*

Biomass Technology Laboratory, Department of Chemical Engineering and Biotechnology Engineering, Université de Sherbrooke, 2500 Boul. de l'Université, Sherbrooke, QC J1K 2R1, Canada; jean-baptiste.beigbeder@usherbrooke.ca (J.-B.B.); Julia.M.M.Dantas@USherbrooke.ca (J.M.M.D.)

\* Correspondence: Jean-Michel.Lavoie2@USherbrooke.ca

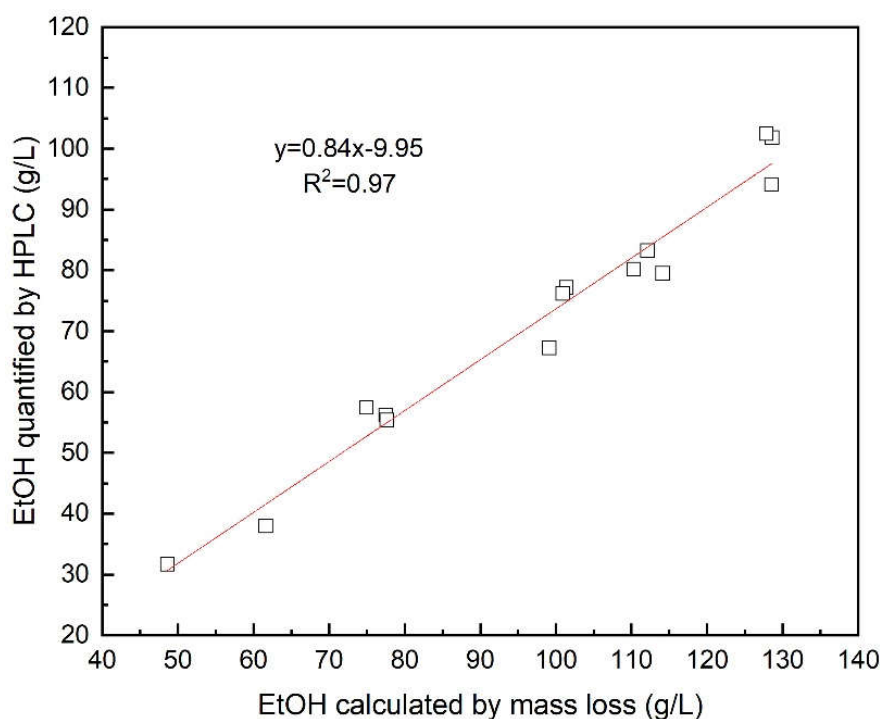

**Figure S1.** Linear regression between experimental ethanol concentrations calculated by mass loss and quantified by HPLC.

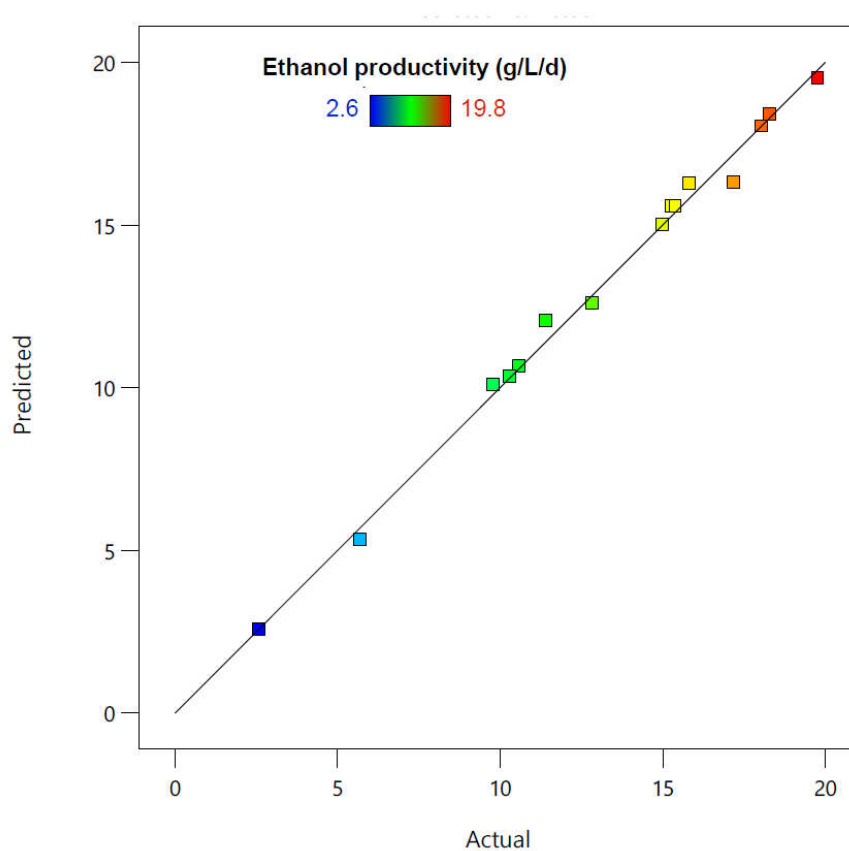

**Figure S2.** “Predicted versus obtained” analysis of the ethanol productivity values generated through the CCD-RSM. The color scale refers to the ethanol productivity values ranging from 2.6 (blue) to 19.8 (red) g/L/d as described in the figure caption.

**Table S1.** Fermentation performances of the confirmation experiments designed during the process optimization.

| Parameter                         | Scenario A | Scenario B |
|-----------------------------------|------------|------------|
| Final ethanol concentration (g/L) | 80.2 ± 0.9 | 86.0 ± 1.4 |
| Ethanol yield (%)                 | 88.5 ± 1.0 | 94.9 ± 1.6 |
| Experimental productivity (g/L/d) | 19.5 ± 0.2 | 21.0 ± 0.3 |
| Predicted productivity (g/L/d)    | 19.8       | 18.6       |
| Error (%)                         | 1.5        | 12.9       |
